# Supplementary material
Source: ML conference proceedings conference paper supplement (https://openreview.net/forum?id=GgD01U3Y0H)
Supplement: supplementary_material [file ranking-domain-gen-full.pdf › figs/ranking-domain-gen-full.pdf]

## COPA

avg

norm

$$\rho = 1$$

$p = 2$

$\rho = 4$

$\rho = 8$

$$\rho = \infty$$

Worst

RSC  
Mixup

HGP  
SagNet

Hutchinson

best
