# Supplementary material
Source: ML conference proceedings conference paper supplement (https://openreview.net/forum?id=GgD01U3Y0H)

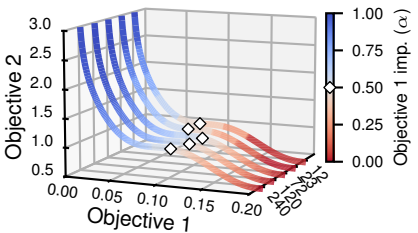

Supplement: supplementary_material [file 3d-synthetic-miss.pdf › figs/3d-synthetic-miss.pdf]

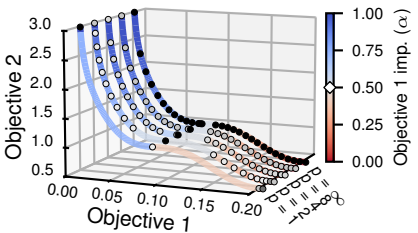

Supplement: supplementary_material [file 3d-synthetic-pnorms.pdf › figs/3d-synthetic-pnorms.pdf]

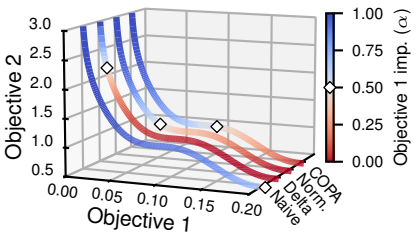

Supplement: supplementary_material [file 3d-synthetic.pdf › figs/3d-synthetic.pdf]

DecodingTrust (Naive vs. COPA)

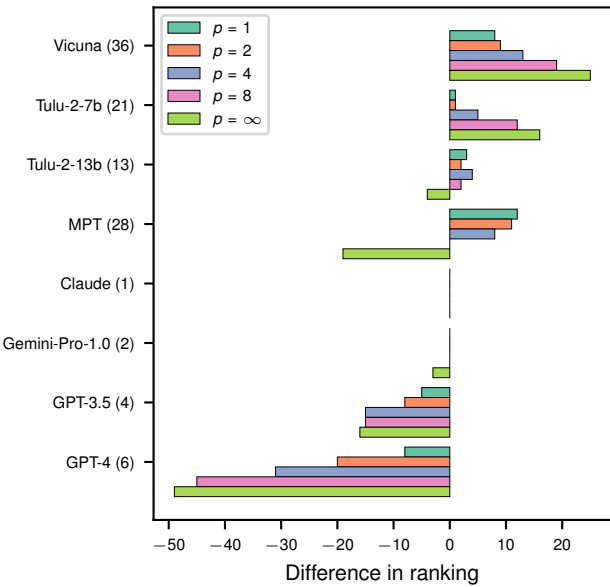

Supplement: supplementary_material [file decodingtrust-barplot.pdf › figs/decodingtrust-barplot.pdf]

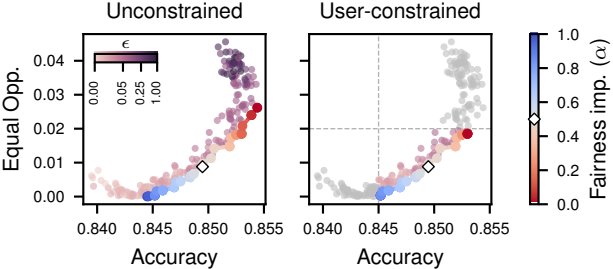

Supplement: supplementary_material [file fairness-case-cdf.pdf › figs/fairness-case-cdf.pdf]

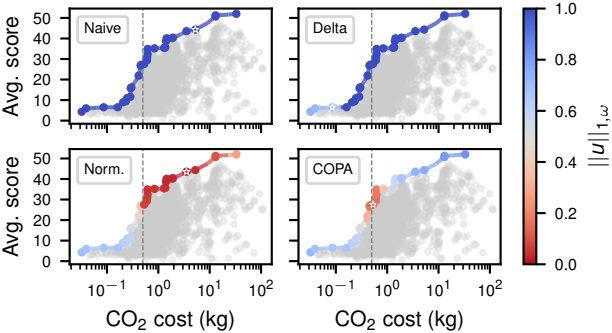

Supplement: supplementary_material [file llms-pareto-full-all.pdf › figs/llms-pareto-full-all.pdf]

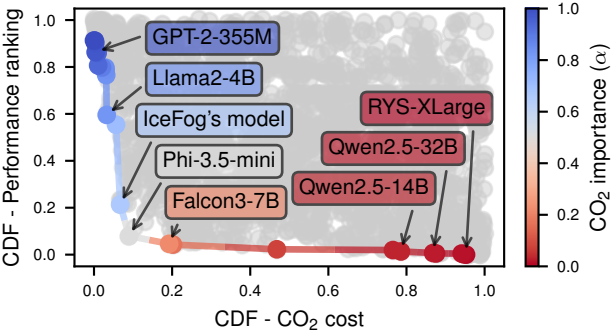

Supplement: supplementary_material [file llms-pareto-full-annotated.pdf › figs/llms-pareto-full-annotated.pdf]

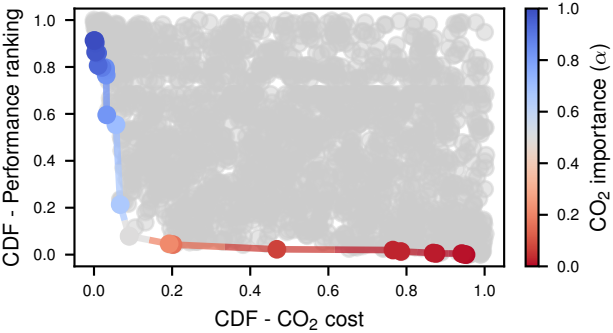

Supplement: supplementary_material [file llms-pareto-full.pdf › figs/llms-pareto-full.pdf]

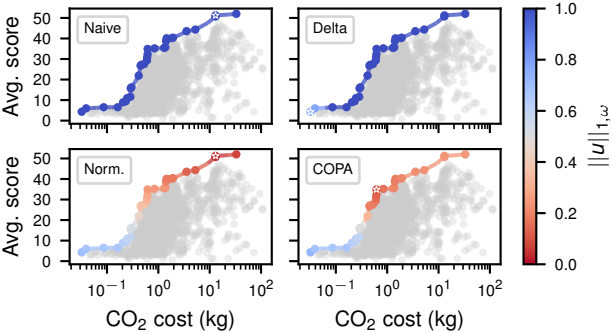

Supplement: supplementary_material [file llms-pareto-one-part.pdf › figs/llms-pareto-one-part.pdf]

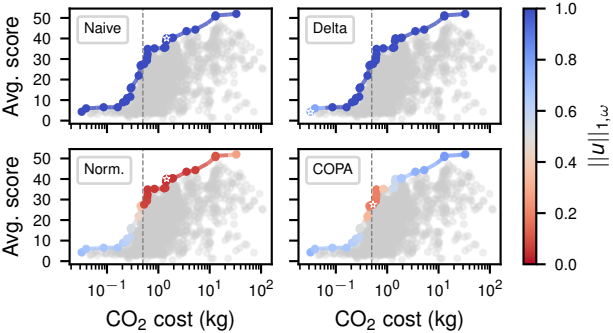

Supplement: supplementary_material [file llms-pareto-two-parts.pdf › figs/llms-pareto-two-parts.pdf]

## COPA

 $\text{MSE}_{\text{density}}$  $\Delta$  $p = 1$  $p = 2$  $p = 4$  $p = 8$  $p = \infty$ 

GradDrop

MGDA-UB

Single

worst

best

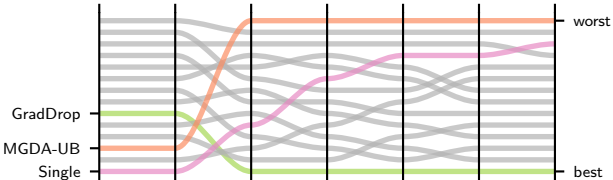

Supplement: supplementary_material [file mtl.pdf › figs/mtl.pdf]

## COPA

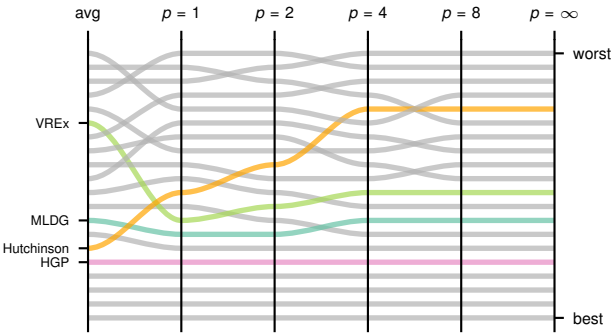

Supplement: supplementary_material [file ranking-domain-gen-table2.pdf › figs/ranking-domain-gen-table2.pdf]

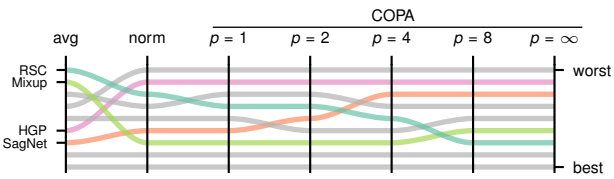

Supplement: supplementary_material [file ranking-domain-gen.pdf › figs/ranking-domain-gen.pdf]
